# Supplementary material
Source: PubMed Central journal article supplement (PMC2881475)
Supplement: NIHMS196063-supplement-2.pdf [file NIHMS196063-supplement-2.pdf]

## Supplementary Information Titles

*Please list each supplementary item and its title or caption, in the order shown below. Please include this form at the end of the Word document of your manuscript or submit it as a separate file.*

**Note that we do NOT copy edit or otherwise change supplementary information, and minor (nonfactual) errors in these documents cannot be corrected after publication.** Please submit document(s) exactly as you want them to appear, with all text, images, legends and references in the desired order, and check carefully for errors.

|                                     |
|-------------------------------------|
| <b>Journal:</b> Nature Neuroscience |
|-------------------------------------|

|                              |                                                                        |
|------------------------------|------------------------------------------------------------------------|
| <b>Article Title:</b>        | A parallel cholinergic brainstem pathway for enhancing locomotor drive |
| <b>Corresponding Author:</b> | Simon Alford                                                           |
|                              |                                                                        |

| Supplementary Item &<br>Number<br><br>(add rows as necessary) | Supplementary Figure 1                                                                           |
|---------------------------------------------------------------|--------------------------------------------------------------------------------------------------|
| Supplementary Figure 1                                        | Muscarinoceptive neurons in the brainstem augment locomotor drive from the MLR to the RS system. |
| Supplementary Table 1                                         | N/A                                                                                              |
| Supplementary Methods<br>(or Discussion or Data or Note)      | N/A                                                                                              |
| Supplementary Video 1<br>(or Audio or Spreadsheet)            | N/A                                                                                              |
